# Supplementary material for: Norovirus NS1/2 protein increases glutaminolysis for efficient viral replication
Source: PubMed Central journal article supplement (PMC10769279; doi:10.1101/2023.12.19.572316), 2023-12-19

## Supplementary Figure 1:

**A**

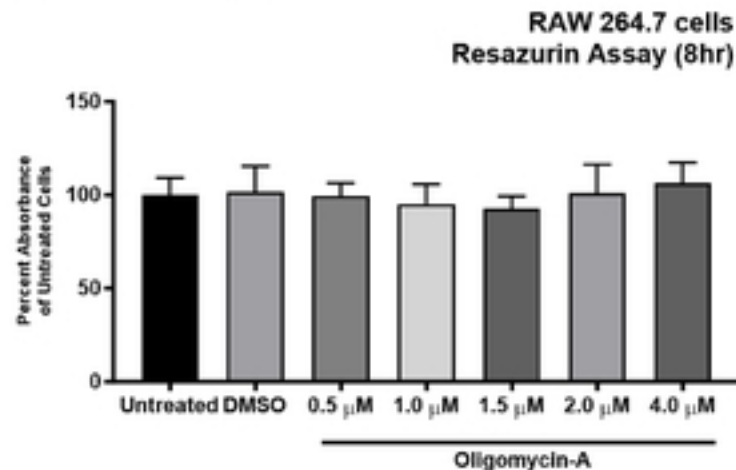

**B**

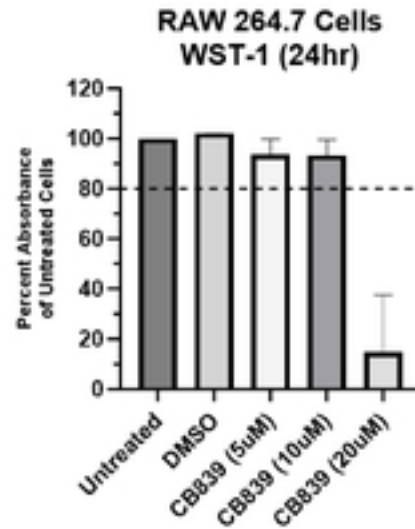

**C**

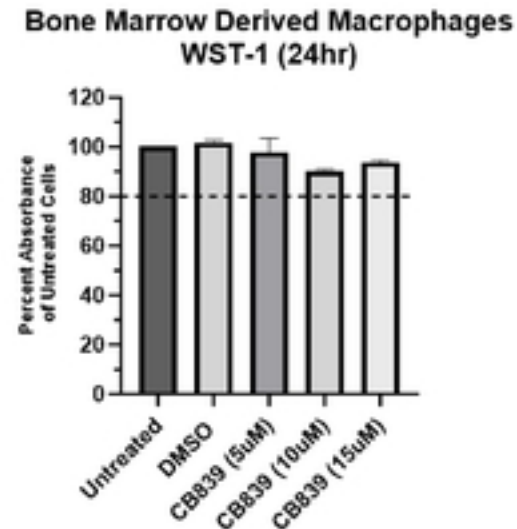

**D**

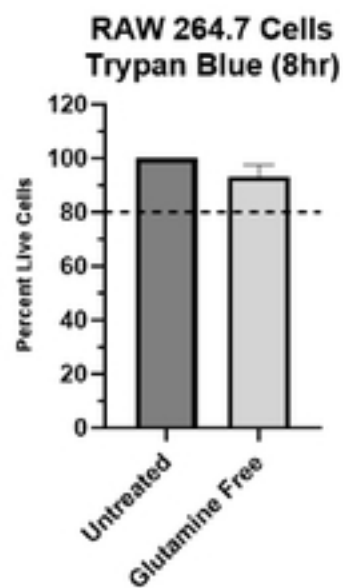

**E**

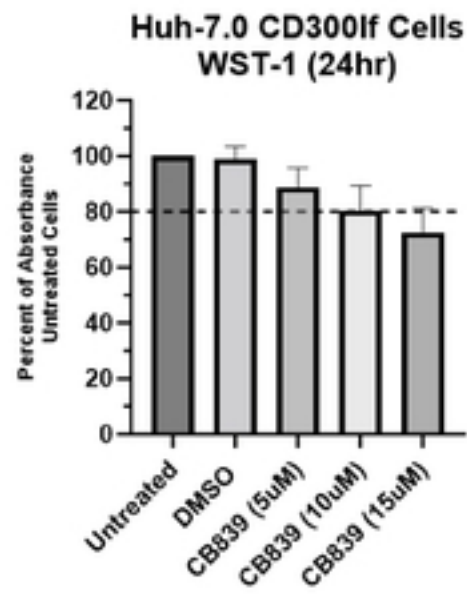

Supplementary Figure 2

**A**

Contribution from Glutamine

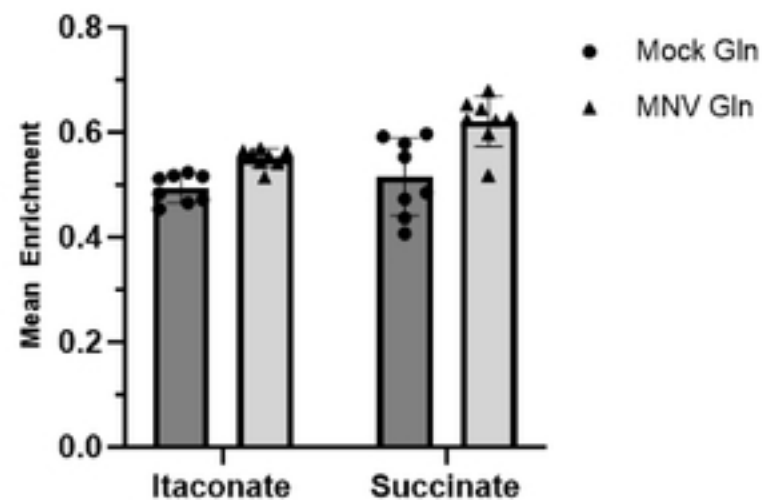

**B**

Intracellular Amino Acid Levels

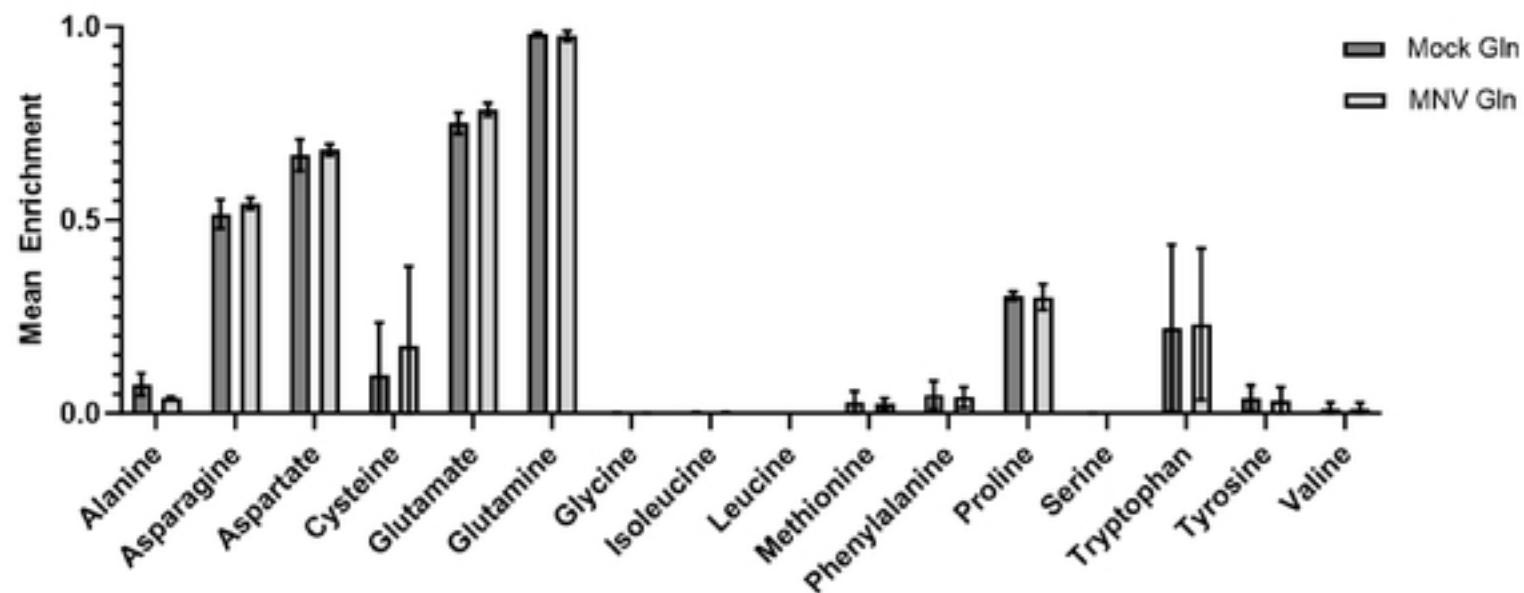

## Supplementary Figure 3: Validation of MNV-1 non-structural protein expression

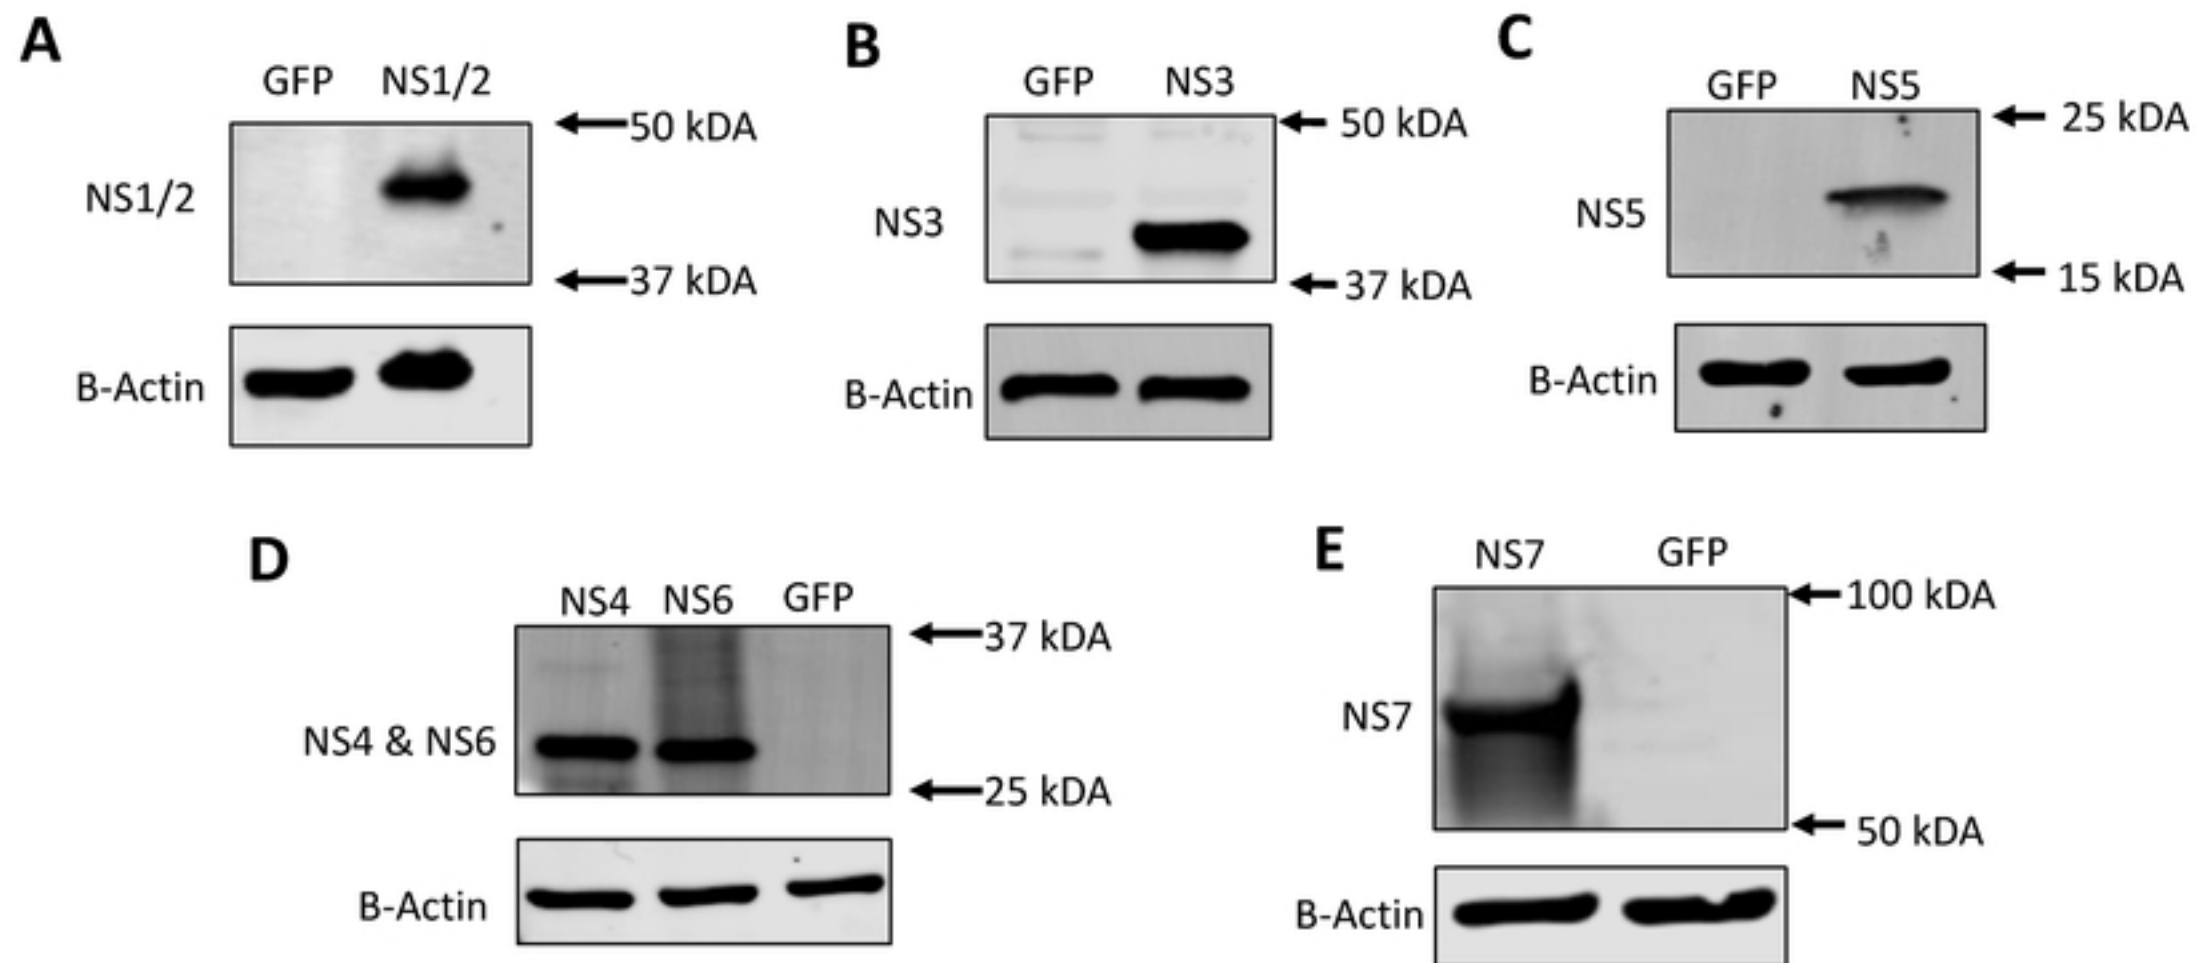

Supplement: NIHPP2023.12.19.572316V1-supplement-1.pdf [file NIHPP2023.12.19.572316V1-supplement-1.pdf]
